# Supplementary material for: Genetic determinants of Vitamin D deficiency in the Middle Eastern Qatari population: a genome-wide association study
Source: Front Nutr. 2023 Sep 29;10:1242257. doi: 10.3389/fnut.2023.1242257 (PMC10570512; doi:10.3389/fnut.2023.1242257)
Supplement: Supplementary file 2 [file Table_2.XLSX]

## Sheet: Supplementary Table 2
Supplementary Table 2. Replication of loci identified by European GWAS (N Sinnott-Armstrong et al. 2021) for vitamin D
Variants resulted from relevant European GWAS (N Sinnott-Armstrong et al. 2021)													Vitamin D Associations identified from Qatar Biobank data
SNP	Mapped Gene	Consequence	CHR	Position (BP)	REF Allele	ALT Allele	Beta	SE (Beta)	P-value	MAF (REF)	Direction	HetPVal	SNP*	CHR	Position (BP)	A1	A2	Beta	SE (Beta)	P-value	MAF (A1)
rs4588	GC	Missense Variant	4	72618323	T	G	-0.2052	0.0027	< 2.2E-308	-	----	2.46e-05	rs4588	4	72618323	T	G	-0.118759	0.0221324	8.06e-08	0.1924
rs2282679	GC	Intron Variant	4	72608383	G	T	-0.2039	0.0027	< 2.2E-308	0.2021	----	3.31e-05	rs2282679	4	72608383	G	T	-0.115264	0.0222303	2.16e-07	0.1914
rs62302167	GC	Intron Variant	4	72639282	T	C	-0.1835	0.0027	< 2.2E-308	0.2057	----	4.22e-05	rs62302167	4	72639282	T	C	-0.111039	0.0228267	1.15e-06	0.18
rs1453467	-	Intergenic Variant	4	72471107	T	C	0.0209	0.0026	1.14e-15	0.5821	++++	0.1117	rs1453467	4	72471107	T	C	0.0714947	0.0185163	0.000112842	0.3355
rs7041	GC	Missense Variant	4	72618334	C	A	0.1532	0.0024	< 2.2E-308	0.3816	++++	1.82e-08	rs7041	4	72618334	C	A	0.0665398	0.0176793	0.000167407	0.4088
rs2060793	CYP2R1	Upstream Gene Variant	11	14915310	G	A	-0.0854	0.0025	2.73e-261	-	--+-	4.63e-11	rs2060793	11	14915310	G	A	-0.069721	0.0189576	0.000235319	0.304
rs35887244	-	Intergenic Variant	4	72455689	C	T	-0.0572	0.0036	8.89e-57	0.1004	----	0.5234	rs35887244	4	72455689	C	T	-0.100223	0.0275831	0.000279618	0.113
rs11023332	PDE3B	Intron Variant	11	14784110	C	G	-0.0761	0.0025	6.86e-208	0.3538	----	0.007699	rs11023332	11	14784110	C	G	-0.0593676	0.0172239	0.00056724	0.4644
rs11023265	PSMA1	Intron Variant	11	14616038	T	C	-0.0636	0.0026	4.88e-135	0.3273	----	0.06739	rs11023265	11	14616038	T	C	-0.0594475	0.01774	0.000805054	0.382
rs10741657	CYP2R1	Upstream Gene Variant	11	14914878	G	A	-0.086	0.0025	6.31e-265	-	--+-	1.98e-09	rs10741657	11	14914878	G	A	-0.0626258	0.0191645	0.0010839	0.2914
rs1993116	CYP2R1	Intron Variant	11	14910234	G	A	-0.0894	0.0025	2.39e-288	0.6919	--+-	5.9e-10	rs1993116	11	14910234	G	A	-0.062209	0.019162	0.00116843	0.2921
rs36037728	AP002387.1	Downstream Gene Variant	11	71111987	T	C	-0.0651	0.0076	8.53e-18	0.0399	----	0.3846	rs36037728	11	71111987	T	C	0.131306	0.0407002	0.00125457	0.0487
rs10028441	HSD17B11	Intron Variant	4	88290265	A	G	-0.0175	0.0027	3.79e-11	0.354	---+	0.2244	rs10028441	4	88290265	A	G	0.0626438	0.0194881	0.00130689	0.2704
rs11732896	HSD17B11	Intron Variant	4	88287993	A	G	-0.0176	0.0027	3.77e-11	0.3544	----	0.3749	rs11732896	4	88287993	A	G	0.0622662	0.0195099	0.00141527	0.2697
rs10010987	-	Intergenic Variant	4	72755840	G	A	-0.0656	0.0028	1.02e-122	0.2234	---+	0.0003985	rs10010987	4	72755840	G	A	-0.0635521	0.0210755	0.00256595	0.2194
rs10832256	-	Intergenic Variant	11	14442875	A	G	-0.0665	0.0026	1.2e-142	0.3393	---+	0.004365	rs10832256	11	14442875	A	G	-0.0531546	0.0177696	0.00277771	0.3953
rs117088421	PDE3B	Intron Variant	11	14714551	G	A	0.0475	0.0068	2.19e-12	0.012	++++	0.6628	rs117088421	11	14714551	G	A	0.115364	0.0391097	0.00318027	0.05251
rs117421906	PDE3B	Intron Variant	11	14732362	C	T	0.0839	0.0081	5.78e-25	0.0088	+++-	0.6048	rs117421906	11	14732362	C	T	0.123214	0.0424151	0.00367308	0.04539
rs17217119	-	Regulatory Region Variant	20	52742590	G	A	-0.0395	0.0031	2.91e-38	0.2186	---+	0.297	rs17217119	20	52742590	G	A	-0.0533368	0.0187151	0.00437271	0.3151
rs12504112	-	Intergenic Variant	4	72718873	C	T	-0.0905	0.0031	1.81e-189	-	----	0.00766	rs12504112	4	72718873	C	T	-0.0629123	0.022126	0.00446407	0.1935
rs12417557	PSMA1	Intron Variant	11	14567538	T	C	0.0606	0.0047	6.3e-38	0.0765	++++	0.5403	rs12417557	11	14567538	T	C	0.0794493	0.029788	0.00764953	0.0931
rs13133781	RP11-618I10.1	Intron, Non Coding Transcript Variant	4	70113537	C	A	0.038	0.0066	8.47e-09	0.0272	+-+-	0.1042	rs13133781	4	70113537	C	A	0.164613	0.0621265	0.00805754	0.02051
rs62318895	-	Intergenic Variant	4	72782528	T	C	-0.0346	0.0026	8e-41	0.2165	---+	0.245	rs62318895	4	72782528	T	C	-0.0530066	0.0201985	0.00868332	0.2485
rs13134261	-	Intergenic Variant	4	70019333	C	T	0.0394	0.0065	1.39e-09	0.0106	+-+-	0.04274	rs13134261	4	70019333	C	T	0.178917	0.0681839	0.00868932	0.01637
rs74588266	SPON1	Intron, Non Coding Transcript Variant	11	14250461	G	A	0.0514	0.0054	2.29e-21	0.016	++--	0.3193	rs74588266	11	14250461	G	A	-0.212842	0.082064	0.00949751	0.011
rs5128	APOC3	3 Prime Utr Variant	11	116703640	C	G	0.0256	0.0043	2.19e-09	0.7658	+++-	0.5614	rs5128	11	116703640	C	G	0.0593835	0.0236475	0.0120322	0.1617
rs71473824	-	Intergenic Variant	11	71063989	T	C	-0.0552	0.0068	3.68e-16	0.103	---+	0.04324	rs71473824	11	71063989	T	C	0.0792329	0.0316304	0.0122464	0.08574
rs117640053	PSMA1	Intron Variant	11	14649377	T	C	0.0521	0.0077	1.1e-11	-	++++	0.8	rs117640053	11	14649377	T	C	0.101598	0.040584	0.0123004	0.04796
rs209960	-	Regulatory Region Variant	20	52716084	C	T	0.0207	0.0027	3.39e-14	-	++++	0.4317	rs209960	20	52716084	C	T	0.0465179	0.0186139	0.0124511	0.3246
rs1881512	SPON1	Intron, Non Coding Transcript Variant	11	14103801	C	T	0.021	0.0026	1.36e-15	-	++--	0.06465	rs1881512	11	14103801	C	T	0.0490675	0.0196803	0.0126586	0.2688
rs1879888	PDE3B	Intron Variant	11	14679247	G	A	-0.0515	0.0024	1.16e-99	-	---+	5.5e-06	rs1879888	11	14679247	G	A	-0.0434552	0.0174929	0.0129855	0.4186
rs9667144	-	Intergenic Variant	11	14421101	G	A	-0.0554	0.0028	4.93e-88	0.2939	---+	0.1445	rs9667144	11	14421101	G	A	-0.0434611	0.0178953	0.0151561	0.3837
rs4756787	RP11-21L19.1	Intron, Non Coding Transcript Variant	11	14292377	A	C	-0.0253	0.0037	8.91e-12	0.8183	---+	0.06074	rs4756787	11	14292377	A	C	-0.0636733	0.0270328	0.0185022	0.1199
rs4845491	SMCP	Upstream Gene Variant	1	152849569	C	T	0.0353	0.0051	4.09e-12	-	++++	0.5711	rs4845491	1	152849569	C	T	-0.064282	0.0276069	0.0198867	0.1095
rs1402155	-	Intergenic Variant	4	72705908	G	A	0.0985	0.0027	3.73e-291	-	++++	0.002004	rs1402155	4	72705908	G	A	0.0460825	0.0198951	0.0205432	0.2602
rs1453459	-	Intergenic Variant	4	72462972	C	T	0.0471	0.0034	4.05e-43	-	+++-	0.1315	rs1453459	4	72462972	C	T	0.0572296	0.0248361	0.0212063	0.1443
rs1431374	RRAS2	Intron Variant	11	14303975	C	T	-0.047	0.0026	9.21e-71	-	----	0.5871	rs1431374	11	14303975	C	T	-0.0429362	0.0187404	0.0219573	0.3131
rs4756786	SPON1	Intron, Non Coding Transcript Variant	11	14285900	A	C	-0.0473	0.0026	1.21e-71	0.2682	----	0.6982	rs4756786	11	14285900	A	C	-0.0424747	0.0187413	0.0234287	0.3131
rs4694424	-	Intergenic Variant	4	72554228	G	A	-0.1078	0.0025	< 2.2E-308	-	----	0.0124	rs4694424	4	72554228	G	A	-0.0420336	0.0187149	0.0247044	0.3214
rs10792642	-	Intergenic Variant	11	71071102	G	T	-0.0315	0.0045	2.86e-12	-	----	0.385	rs10792642	11	71071102	G	T	0.0569112	0.0255256	0.0257758	0.1387
rs395371	-	Intergenic Variant	4	72572374	G	A	-0.0747	0.0026	2.76e-183	0.6865	----	0.01973	rs395371	4	72572374	G	A	-0.0390499	0.0175878	0.0263999	0.4018
rs2282302	FLG2	Missense Variant	1	152329369	G	C	-0.018	0.0031	7.4e-09	0.1366	--+-	0.1817	rs2282302	1	152329369	G	C	-0.0435692	0.0197794	0.0276121	0.2536
rs2228603	NCAN	Missense Variant	19	19329924	T	C	0.0368	0.0046	2.09e-15	-	++-+	0.2495	rs2228603	19	19329924	T	C	-0.148759	0.0685926	0.0301028	0.01728
rs11023121	SPON1	Intron, Non Coding Transcript Variant	11	14186021	C	T	0.0251	0.0032	1.95e-15	0.1865	++++	0.7389	rs11023121	11	14186021	C	T	0.0430824	0.0199821	0.0310797	0.2495
rs11848067	Y_RNA	Upstream Gene Variant	14	39453073	G	A	0.035	0.0041	6.18e-18	0.1116	++++	0.7794	rs11848067	14	39453073	G	A	0.0512501	0.0239949	0.0326898	0.1555
rs6815610	-	Intergenic Variant	4	72836198	A	G	0.0397	0.0027	7.13e-48	0.1767	++++	0.5717	rs6815610	4	72836198	A	G	0.0401474	0.0188397	0.0330893	0.3033
rs1792325	AP002387.1	Downstream Gene Variant	11	71113304	T	C	-0.0287	0.0025	8.69e-31	-	---+	0.3007	rs1792325	11	71113304	T	C	0.036704	0.0172752	0.0336142	0.4562
rs71352239	APOC1P1	Upstream Gene Variant	19	45429543	T	C	-0.0164	0.0028	2.83e-09	0.2109	--+-	0.3261	rs71352239	19	45429543	T	C	0.0516226	0.0245045	0.0351469	0.146
rs118059895	PDE3B	Intron Variant	11	14711689	T	C	-0.0517	0.0057	9.75e-20	0.014	----	0.4754	rs118059895	11	14711689	T	C	-0.101458	0.0484022	0.0360697	0.03233
rs676210	APOB	Missense Variant	2	21231524	A	G	0.0163	0.003	4.99e-08	0.3662	++-+	0.2873	rs676210	2	21231524	A	G	-0.0385644	0.0185585	0.0377106	0.3356
rs10499183	MED23	Intron Variant	6	131940484	C	T	-0.0211	0.0031	8.04e-12	-	----	0.319	rs10499183	6	131940484	C	T	0.038766	0.0187974	0.039178	0.3255
rs1553006	CALCB	Upstream Gene Variant	11	14922950	G	A	-0.0535	0.0024	3.44e-106	-	----	5.13e-05	rs1553006	11	14922950	G	A	-0.0364978	0.0177494	0.0397555	0.3846
rs112430777	SLC4A4	Intron Variant	4	72257082	A	G	0.0437	0.008	4.79e-08	0.0076	++++	0.6083	rs112430777	4	72257082	A	G	0.119447	0.0581531	0.0399742	0.0235
rs1790309	AP002387.1	Intron, Non Coding Transcript Variant	11	71109015	A	G	-0.0527	0.0049	9.77e-27	0.2222	----	0.06816	rs1790309	11	71109015	A	G	0.0503795	0.0247029	0.0414089	0.1411
rs673548	APOB	Intron Variant	2	21237544	A	G	0.0167	0.003	2.45e-08	0.3858	++-+	0.3042	rs673548	2	21237544	A	G	-0.0376501	0.0185056	0.0418989	0.3428
rs66837437	HSD17B13	Upstream Gene Variant	4	88246200	C	A	-0.0221	0.0036	8.56e-10	0.1454	----	0.8061	rs66837437	4	88246200	C	A	0.0499363	0.024583	0.0422215	0.1417
rs72661006	-	Intergenic Variant	4	73709923	T	C	0.0269	0.0048	1.71e-08	0.0172	++++	0.7344	rs72661006	4	73709923	T	C	0.118239	0.0587471	0.0441486	0.02225
rs11233800	NADSYN1	Intron Variant	11	71182901	A	G	-0.1007	0.0064	1.35e-55	0.0922	---+	0.009388	rs11233800	11	71182901	A	G	-0.053449	0.0267773	0.0459279	0.1173
* Presented data show the same variants associated with vitamin D as reported by N Sinnott-Armstrong et al. Please see Supplementory Table 1 for parameter detalis.
