# Supplementary material for: Genetic determinants of Vitamin D deficiency in the Middle Eastern Qatari population: a genome-wide association study
Source: Front Nutr. 2023 Sep 29;10:1242257. doi: 10.3389/fnut.2023.1242257 (PMC10570512; doi:10.3389/fnut.2023.1242257)
Supplement: Supplementary file 5 [file Data_Sheet_1.xlsx]

## Sheet: DataSheet
SNP ID*	Mapped Gene	HGVS ID	Consequence	Entrezgene	Name
rs12504112	-	NC_000004.12:g.71853156T>G	Intergenic Variant
rs10832256	-	NC_000011.10:g.14421329G>A	Intergenic Variant
rs10010987	-	NC_000004.12:g.71890123A>G	Intergenic Variant
rs9667144	-	NC_000011.10:g.14399555A>G	Intergenic Variant
rs6815610	-	NC_000004.12:g.71970481G>A	Intergenic Variant
rs1453459	-	NC_000004.12:g.71597255T>A	Intergenic Variant
rs62318895	-	NC_000004.12:g.71916811C>T	Intergenic Variant
rs17217119	-	NC_000020.11:g.54126051A>G	Regulatory region Variant
rs209960	-	NC_000020.11:g.54099545T>G	Regulatory region Variant
rs72661006	-	NC_000004.12:g.72844206C>T	Intergenic Variant
rs67609747	-	NC_000011.10:g.15104204T>C	Intergenic Variant
rs1945603	-	NC_000011.10:g.15253612A>G	Intergenic Variant
rs1453467	-	NC_000004.12:g.71605390C>T	Intergenic Variant
rs4694424	-	NC_000004.12:g.71688511A>T	Intergenic Variant
rs395371	-	NC_000004.12:g.71706657A>G	Intergenic Variant
rs10792642	-	NC_000011.10:g.71360056T>G	Intergenic Variant
rs35821356	-	NC_000004.12:g.71624151C>G	Intergenic Variant
rs12642630	-	NC_000004.12:g.71622114T>C	Intergenic Variant
rs12648186	-	NC_000004.12:g.71606150C>T	Intergenic Variant
rs35846253	-	NC_000004.12:g.71606855C>A	Intergenic Variant
rs11724552	-	NC_000004.12:g.71641584G>A	Intergenic Variant
rs9381846	-	NC_000006.12:g.50175904A>G	Intergenic Variant
rs17155092	-	NC_000007.14:g.81341319A>G	Intergenic Variant
rs73121713	-	NC_000007.14:g.62818884G>A	Intergenic Variant
rs113385418	-	NC_000007.14:g.62788918C>A	Intergenic Variant
rs4557578	-	NC_000007.14:g.62680897A>T	Intergenic Variant
rs1340851	-	NC_000006.12:g.50164572T>C	Intergenic Variant
rs113526446	-	NC_000007.14:g.62817815G>A	Intergenic Variant
rs12218081	-	NC_000010.11:g.16375787A>C	Intergenic Variant
rs73121714	-	NC_000007.14:g.62819657C>A	Intergenic Variant
rs79688268	-	NC_000004.12:g.10937383A>G	Intergenic Variant
rs78177056	-	NC_000004.12:g.10937785A>G	Intergenic Variant
rs9381844	-	NC_000006.12:g.50172668T>A	Intergenic Variant
rs9395552	-	NC_000006.12:g.50156494T>C	Intergenic Variant
rs73127475	-	NC_000007.14:g.62975332T>G	Intergenic Variant
rs972781	-	NC_000006.12:g.50146093T>A	Intergenic Variant
rs9381845	-	NC_000006.12:g.50172958A>G	Intergenic Variant
rs9369934	-	NC_000006.12:g.50163841C>T	Intergenic Variant
rs9369933	-	NC_000006.12:g.50154499A>T	Intergenic Variant
rs112770650	-	NC_000006.12:g.50161358G>T	Intergenic Variant
rs80028165	-	NC_000004.12:g.10922900C>T	Intergenic Variant
rs73119874	-	NC_000007.14:g.62806171G>C	Intergenic Variant
rs972779	-	NC_000006.12:g.50146190C>T	Intergenic Variant
rs4715179	-	NC_000006.12:g.50147548C>T	Intergenic Variant
rs2123592	-	NC_000007.14:g.62638358T>G	Intergenic Variant
rs4879562	-	NC_000009.12:g.32118803G>A	Intergenic Variant
rs4134372	-	NC_000007.14:g.62785197C>T	Intergenic Variant
rs9395557	-	NC_000006.12:g.50174323G>A	Intergenic Variant
rs9395558	-	NC_000006.12:g.50174366A>G	Intergenic Variant
rs7854500	-	NC_000009.12:g.32111777A>T	Intergenic Variant
rs4715178	-	NC_000006.12:g.50132088G>T	Intergenic Variant
rs1595126	-	NC_000007.14:g.22846347G>A	Intergenic Variant
rs112746497	-	NC_000004.12:g.10940810T>C	Intergenic Variant
rs9381841	-	NC_000006.12:g.50136501C>G	Intergenic Variant
rs1582179	-	NC_000006.12:g.50165923C>G	Intergenic Variant
rs8188490	-	NC_000007.14:g.62981554C>T	Intergenic Variant
rs6971869	-	NC_000007.14:g.57747314A>C	Intergenic Variant
rs75482304	-	NC_000007.14:g.81342957G>A	Intergenic Variant
rs1947966	-	NC_000007.14:g.57738206A>C	Intergenic Variant
rs17748654	-	NC_000007.14:g.63024724C>T	Intergenic Variant
rs73125349	-	NC_000007.14:g.62940603G>A	Intergenic Variant
rs7039138	-	NC_000009.12:g.32114397A>T	Intergenic Variant
rs147164084	-	NC_000008.11:g.57097974G>A, CHR_HG2067_PATCH:g.57103772G>A	Intergenic Variant
rs4343975	-	NC_000007.14:g.62760241G>T	Intergenic Variant
rs111656325	-	NC_000008.11:g.57101352C>A, CHR_HG2067_PATCH:g.57107150C>A	Intergenic Variant
rs4711944	-	NC_000006.12:g.50132159C>T	Intergenic Variant
rs80159872	-	NC_000004.12:g.10942898C>T	Intergenic Variant
rs10949878	-	NC_000007.14:g.62674339A>T	Intergenic Variant
rs112966758	-	NC_000007.14:g.62759295T>C	Intergenic Variant
rs2033991	-	NC_000006.12:g.50208136T>C	Intergenic Variant
rs141520610;rs2123596	-	NC_000007.14:g.62621728G>A	-
rs2315987	-	NC_000007.14:g.57801801T>C	Intergenic Variant
rs821565	-	NC_000007.14:g.63030294A>G	Intergenic Variant
rs2686849	-	NC_000007.14:g.63076627A>C	Intergenic Variant
rs111535204	-	NC_000008.11:g.57104920G>A, CHR_HG2067_PATCH:g.57110718G>A	Intergenic Variant
rs9369932	-	NC_000006.12:g.50129169G>C	Intergenic Variant
rs184518367	-	NC_000023.11:g.131198607T>A	Intergenic Variant
rs10233590	-	NC_000007.14:g.62777085C>G	Intergenic Variant
rs113210493	-	NC_000007.14:g.62701126C>T	Intergenic Variant
rs7048246	-	NC_000009.12:g.32116455G>C	Intergenic Variant
rs35876831	-	NC_000004.12:g.63638002G>A	Intergenic Variant
rs6947918	-	NC_000007.14:g.57761632T>A	Intergenic Variant
rs4361661	-	NC_000007.14:g.62751851A>G	Intergenic Variant
rs10036794	-	NC_000005.10:g.2323215C>T	Intergenic Variant
rs9690089	-	NC_000007.14:g.61082615G>A	Intergenic Variant
rs75168316	-	NC_000005.10:g.153355750C>T	Intergenic Variant
rs73117660	-	NC_000007.14:g.63026400T>C	Intergenic Variant
rs73131926	-	NC_000007.14:g.62754033G>A	Intergenic Variant
rs62114081	-	NC_000019.10:g.24268290C>A	Intergenic Variant
rs143781193	-	NC_000019.10:g.24326190T>A	Intergenic Variant
rs4870698	-	NC_000007.14:g.57765377G>A	Intergenic Variant
rs13240117	-	NC_000007.14:g.57789014A>T	Intergenic Variant
rs113667943	-	NC_000008.11:g.57115453C>T, CHR_HG2067_PATCH:g.57121251A>G	Intergenic Variant
rs9369942	-	NC_000006.12:g.50216342A>G	Intergenic Variant
rs9369941	-	NC_000006.12:g.50216030C>T	Intergenic Variant
rs78590597	-	NC_000007.14:g.62815337C>T	Intergenic Variant
rs10266160	-	NC_000007.14:g.63099592G>A	Intergenic Variant
rs1856853	-	NC_000006.12:g.50230534G>T	Intergenic Variant
rs73121786	-	NC_000007.14:g.62878357G>C	Intergenic Variant
rs8185586	-	NC_000007.14:g.57892826T>C	Intergenic Variant
rs76151384	AC079612.1	NC_000002.12:g.239576429T>A	Upstream Gene Variant
rs7636863	AC091493.2	NC_000003.12:g.16702013G>A, CHR_HG2236_PATCH:g.16702013G>A	Upstream Gene Variant
rs1792325	ACTE1P	NC_000011.10:g.71402258C>T	Intron variant	399923	actin epsilon 1, pseudogene
rs973878	AP000472.2	NC_000021.9:g.22077182G>A	Intron, Non Coding Transcript Variant
rs2827231	AP000472.2	NC_000021.9:g.22073236A>C	Intron, Non Coding Transcript Variant
rs2827221	AP000472.2	NC_000021.9:g.22066825C>T	Intron, Non Coding Transcript Variant
rs2827228	AP000472.2	NC_000021.9:g.22070713A>C	Intron, Non Coding Transcript Variant
rs7281274	AP000472.2	NC_000021.9:g.22073584C>A	Intron, Non Coding Transcript Variant
rs1790309	AP002387.1	NC_000011.10:g.71397969G>A	Intron, Non Coding Transcript Variant
rs36037728	AP002387.1	NC_000011.10:g.71400941C>T	Downstream Gene Variant
rs676210	APOB	NC_000002.12:g.21008652G>T	Missense Variant	338	apolipoprotein B
rs673548	APOB	NC_000002.12:g.21014672G>T	Intron Variant
rs71352239	APOC1 - APOC1P1	NC_000019.10:g.44926286C>T	Intergenic variant	341	apolipoprotein C1
rs5128	APOC3	NC_000011.10:g.116832924G>C	3 prime UTR Variant	345	apolipoprotein C3
rs1553006	CALCB	NC_000011.10:g.14901404A>T	Upstream gene Variant	797	calcitonin related polypeptide beta
rs2165540	CEACAM16	NC_000019.10:g.44699677A>G, LRG_1283:g.5527A>G	Intron Variant	388551	CEA cell adhesion molecule 16, tectorial membrane component
rs9806372	CTD-2184D3.5	NC_000015.10:g.52073682G>A	Intron, Non Coding Transcript Variant
rs1993116	CYP2R1	NC_000011.10:g.14888688A>G	Intron Variant	120227	cytochrome P450 family 2 subfamily R member 1
rs10741657	CYP2R1 - CALCB	NC_000011.10:g.14893332A>C	Upstream gene variant
rs2060793	CYP2R1 - CALCB	NC_000011.10:g.14893764A>C	Intergenic variant
rs72626030	DMD	NC_000023.11:g.32273818A>T, LRG_199:g.1070792T>A	Intron Variant	1756	dystrophin
rs72626032	DMD	NC_000023.11:g.32289148A>T, LRG_199:g.1055462T>A	Intron Variant
rs142383939	DMD	NC_000023.11:g.32280967G>T, LRG_199:g.1063643C>A	Intron Variant
rs72626029	DMD	NC_000023.11:g.32260587G>A, LRG_199:g.1084023C>T	Intron Variant
rs72626026	DMD	NC_000023.11:g.32247441G>A, LRG_199:g.1097169C>T	Intron Variant
rs6057648	DNMT3B	NC_000020.11:g.32797074C>T, LRG_56:g.39690C>T	Intron Variant	1789	DNA methyltransferase 3 beta
rs2282302	FLG2	NC_000001.11:g.152356893C>G	Missense Variant	388698	filaggrin 2
rs2282679	GC	NC_000004.12:g.71742666T>G	Intron variant	2638	GC vitamin D binding protein
rs4588	GC	NC_000004.12:g.71752606G>T	Missense variant
rs7041	GC	NC_000004.12:g.71752617A>C	Missense variant
rs62302167	GC	NC_000004.12:g.71773565C>T	Intron Variant
rs11723621	GC	NC_000004.12:g.71749645A>G	Intron Variant
rs1352846	GC	NC_000004.12:g.71752058A>C	Intron Variant
rs3755967	GC	NC_000004.12:g.71743681C>A	Intron Variant
rs17467825	GC	NC_000004.12:g.71739800A>G	Downstream Gene Variant
rs2282680	GC	NC_000004.12:g.71742647C>T	Intron Variant
rs1155563	GC	NC_000004.12:g.71777771T>C	Intron Variant
rs2298850	GC	NC_000004.12:g.71748550G>C	Intron Variant
rs1402155	GC - NA	NC_000004.12:g.71840191A>G	Intergenic variant
rs11631833	GOLGA6D	NC_000015.10:g.75295921G>A	Downstream Gene Variant	653643	golgin A6 family member D
rs62400468	GPLD1	NC_000006.12:g.24457130C>T	Intron Variant	2822	glycosylphosphatidylinositol specific phospholipase D1
rs2744570	GPLD1	NC_000006.12:g.24487206C>T	Intron Variant
rs4426492	HS1BP3	NC_000002.12:g.20633127G>A	Intron Variant	64342	HCLS1 binding protein 3
rs62122090	HS1BP3	NC_000002.12:g.20628549C>T	Intron Variant
rs72784303	HS1BP3	NC_000002.12:g.20629956C>T	Intron Variant
rs73916930	HS1BP3	NC_000002.12:g.20628921G>T	Intron Variant
rs73916931	HS1BP3	NC_000002.12:g.20628926G>A	Intron Variant	51170	hydroxysteroid 17-beta dehydrogenase 11
rs11732896	HSD17B11	NC_000004.12:g.87366841G>A	Intron variant
rs10028441	HSD17B11	NC_000004.12:g.87369113G>A	Intron Variant
rs66837437	HSD17B13	NC_000004.12:g.87325048A>C	Upstream Gene Variant	345275	hydroxysteroid 17-beta dehydrogenase 13
rs10125001	HSD17B3	NC_000009.12:g.96260955G>C, LRG_1296:g.46198C>G	Intron Variant	3293	hydroxysteroid 17-beta dehydrogenase 3
rs10490353	LINC01121	NC_000002.12:g.45189455G>C	Intron, Non Coding Transcript Variant	400952	long intergenic non-protein coding RNA 1121
rs10499183	MED23	NC_000006.12:g.131619344T>C	Intron Variant	9439	mediator complex subunit 23
rs12504110	MTATP6P9	NC_000004.12:g.155458441G>C	Non Coding Transcript Exon Variant	106479044	MT-ATP6 pseudogene 9
rs61655692	MTND4P8	NC_000004.12:g.155455321C>G	Non Coding Transcript Exon Variant	100873194	MT-ND4 pseudogene 8
rs71473824	NA - ACTE1P	NC_000011.10:g.71352943C>T	Intergenic variant	55191	NAD synthetase 1
rs11233800	NADSYN1	NC_000011.10:g.71471855G>A	Intron Variant	1463	neurocan
rs2228603	NCAN	NC_000019.10:g.19219115C>T	Missense Variant	5140	phosphodiesterase 3B
rs1879888	PDE3B	NC_000011.10:g.14657701A>C	Intron Variant
rs118059895	PDE3B	NC_000011.10:g.14690143C>T	Intron Variant
rs117088421	PDE3B	NC_000011.10:g.14693005A>G	Intron Variant
rs11023332	PDE3B	NC_000011.10:g.14762564G>C	Intron variant
rs117421906	PDE3B	NC_000011.10:g.14710816T>C	Intron variant
rs11023265	PSMA1	NC_000011.10:g.14594492C>T	Intron Variant
rs117640053	PSMA1	NC_000011.10:g.14627831C>G	Intron Variant	5682	proteasome 20S subunit alpha 1
rs12417557	PSMA1	NC_000011.10:g.14545992C>T	Intron variant	23518	R3H domain containing 1
rs145056585	R3HDM1	NC_000002.12:g.135624388C>T	Intron Variant	22930	RAB3 GTPase activating protein catalytic subunit 1
rs78560065	RAB3GAP1	NC_000002.12:g.135052255C>G	Upstream Gene Variant	54715	RNA binding fox-1 homolog 1
rs12597944	RBFOX1	NC_000016.10:g.6824143G>A	Intron Variant
rs12598038	RBFOX1	NC_000016.10:g.6823806C>G	Intron Variant	106479750	RNA, U6 small nuclear 417, pseudogene
rs74384069	RNU6-417P	NC_000007.14:g.63009788G>A	Downstream Gene Variant
rs73363024	RNU6-417P	NC_000007.14:g.63012796G>A	Upstream Gene Variant
rs4870703	RP11-548K12.2	NC_000007.14:g.57820256G>C	Non Coding Transcript Exon Variant
rs2101222	RP11-548K12.3	NC_000007.14:g.57821537C>A	Upstream Gene Variant
rs4442081	RP11-548K12.9	NC_000007.14:g.57814091A>T	Upstream Gene Variant
rs13133781	RP11-618I10.1	NC_000004.12:g.69247819A>G	Intron, Non Coding Transcript Variant
rs1431374	RRAS2	NC_000011.10:g.14282429T>C	Intron Variant	22800	RAS related 2
rs112430777	SLC4A4	NC_000004.12:g.71391365G>A	Intron Variant	8671	solute carrier family 4 member 4
rs35887244	SLC4A4 - NA	NC_000004.12:g.71589972T>C	Intergenic variant
rs4845491	SMCP	NC_000001.11:g.152877093T>C	Upstream Gene Variant	4184	sperm mitochondria associated cysteine rich protein
rs4756786	SPON1	NC_000011.10:g.14264354C>G	Intron Variant, non coding transcript Variant	10418	spondin 1
rs1881512	SPON1	NC_000011.10:g.14082255T>G	Intron Variant, non coding transcript Variant
rs11023121	SPON1	NC_000011.10:g.14164475T>C	Intron Variant, non coding transcript Variant
rs74588266	SPON1	NC_000011.10:g.14228915A>G	Intron, Non Coding Transcript Variant
rs4756787	SPON1-AS1	NC_000011.10:g.14270831C>A	Intron variant	109729138	SPON1 antisense RNA 1
rs4903222	SYNDIG1L	NC_000014.9:g.74414035G>T	Intron Variant	646658	synapse differentiation inducing 1 like
rs112323376	TUBA8	NC_000022.11:g.18128589C>T	Intron Variant	51807	tubulin alpha 8
rs13134261	UGT2B7 - UGT2B11	NC_000004.12:g.69153615T>C	Intergenic variant	10720	UDP glucuronosyltransferase family 2 member B11
rs1949836	ULK4	NC_000003.12:g.41276667C>G	Intron Variant	54986	unc-51 like kinase 4
rs6767529	ULK4	NC_000003.12:g.41328867C>T	Intron Variant
rs6768531	ULK4	NC_000003.12:g.41319142C>G	Intron Variant
rs4973934	ULK4	NC_000003.12:g.41313019A>G	Intron Variant
rs4515026	ULK4	NC_000003.12:g.41281495T>C	Intron Variant
rs7630526	ULK4	NC_000003.12:g.41316999G>A	Intron Variant
rs6770252	ULK4	NC_000003.12:g.41322750G>A	Intron Variant
rs2371488	ULK4	NC_000003.12:g.41271984G>T	Intron Variant
rs4973875	ULK4	NC_000003.12:g.41313041T>C	Intron Variant
rs2091232	ULK4	NC_000003.12:g.41304089C>A	Intron Variant
rs7637185	ULK4	NC_000003.12:g.41302363T>G	Intron Variant
rs9853680	ULK4	NC_000003.12:g.41283720T>C	Intron Variant
rs6763756	ULK4	NC_000003.12:g.41327558C>T	Intron Variant
rs9878048	ULK4	NC_000003.12:g.41309796A>T	Intron Variant
rs659872	WBSCR17	NC_000007.14:g.71677795G>A	Intron Variant
rs11848067	Y_RNA	NC_000014.9:g.38983869A>G	Upstream gene Variant
rs190674884	ZRANB3	NC_000002.12:g.135401707T>C	Intron Variant	84083	zinc finger RANBP2-type containing 3
rs187253360	ZRANB3	NC_000002.12:g.135394002C>T	Intron Variant
rs150662700	ZRANB3	NC_000002.12:g.135441611A>G	Intron Variant
